# Supplementary material
Source: publisher figshare collection journal article supplement (https://acs.figshare.com/ndownloader/files/7526533)
Supplement: Supplementary file 1 [file 7526533]

## Corresponding Information for

### Sequential Infiltration Synthesis for the Design of Low Refractive Index Surface Coatings with Controllable Thickness

Diana Berman,<sup>\*,§</sup> Supratik Guha,<sup>‡||</sup> Byeongdu Lee,<sup>⊥</sup> Jeffrey W. Elam,<sup>†</sup> Seth B. Darling,<sup>‡||</sup> and Elena V. Shevchenko<sup>\*,‡</sup>

<sup>‡</sup>Center for Nanoscale Materials, <sup>†</sup>Energy Systems Division, and <sup>⊥</sup>Advanced Photon Source, Argonne National Laboratory, Argonne, Illinois 60439 United States

<sup>§</sup>Materials Science and Engineering Department, University of North Texas, Denton, Texas 76203 United States

<sup>||</sup>Institute for Molecular Engineering, University of Chicago, Chicago, Illinois 60637 United States

**Corresponding authors:** Diana Berman (Diana.Berman@unt.edu), Elena Shevchenko (eshevchenko@anl.gov).

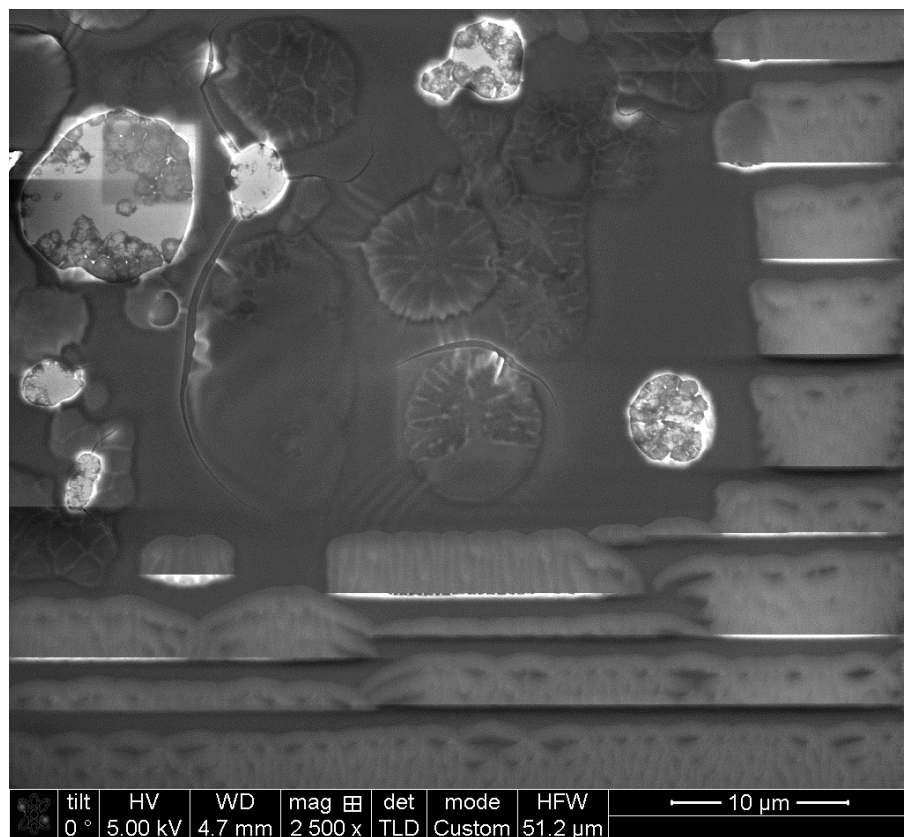

**Figure S1.** SEM image demonstrating the rupture of aluminum oxide films during oxygen plasma assisted polymer removal.

**Table S1.** Summary of the SAXS and GISAXS data.

| Sample | e-density | Porosity(%) | Size(H)    | Size(V) | Film thickness |
|--------|-----------|-------------|------------|---------|----------------|
| 3      | 0.243     | 74          | 24.6(9.9)  | 5.0nm   | ~45 nm         |
| 5      | 0.214     | 80          | 27.0(11.7) | 4.3nm   | -              |
| 8      | 0.403     | 65          | 24.5(9.9)  | 6.1nm   | -              |
| 10     | ~0.7      | 40          | 8.5        | 8.2nm   | -              |

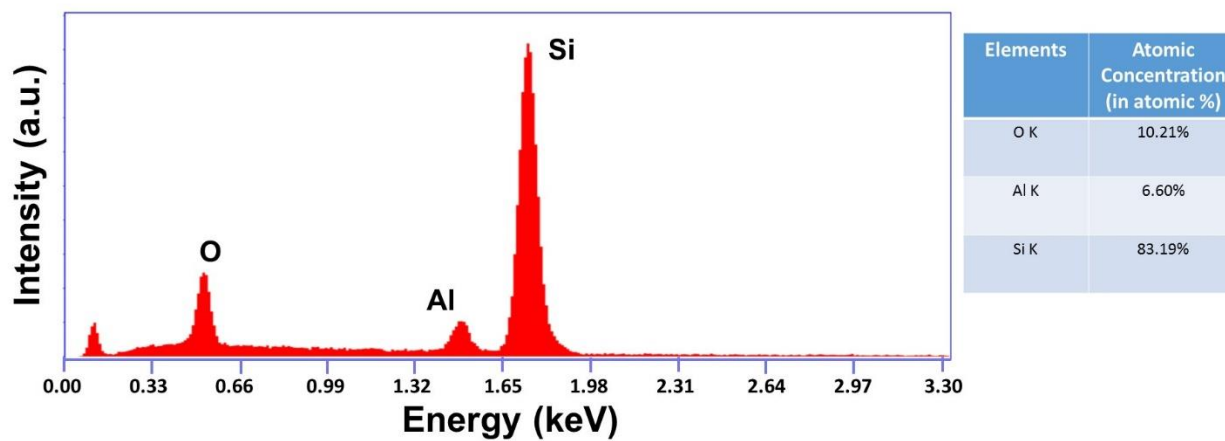

**Figure S2.** Representative EDS data on aluminum oxide films obtained by SIS. These data were obtained for samples prepared using PS-B-P4VP template exposed to 5 SIS cycles. No peak at 0.277 keV indicates no carbon in the sample.
